# Supplementary material
Source: publisher site journal article supplement (https://www.dovepress.com/article/235542)
Supplement: Supplementary file 1 [file 235542-Supplementary-Table-2.pdf › 235542-Supplementary-Table-2.pdf]

**Supplementary Information for**

**Current challenges and opportunities in designing protein-protein interaction targeted  
drugs**

Woong-Hee Shin, Keiko Kumazawa, Kenichiro Imai, Takatsugu Hirokawa, and Daisuke Kihara\*

\* Corresponding Author: [dkihara@purdue.edu](mailto:dkihara@purdue.edu)

**Supplementary Table S1. List of PPI drugs and candidates (in a separate Excel file)**

**Supplementary Table S2. PDB entries used for the FTMap analysis**

| Typical Pockets (DUD) |        | Protein-Protein Interfaces (2P2I + Table 1) |                         |                        |
|-----------------------|--------|---------------------------------------------|-------------------------|------------------------|
| Protein               | PDB ID | PPI                                         | Protein Bound<br>PDB ID | SMPPPI Bound<br>PDB ID |
| AChE                  | 1EVE   | Bcl2/Bax                                    | 2XA0                    | 2O22                   |
| AmpC                  | 1XGJ   | BclXL/Bak                                   | 1BXL                    | 3ZLR                   |
| AR                    | 1XQ2   | HDM2/P53                                    | 1YCR                    | 3TJ2                   |
| CDK2                  | 1CKP   | HPV_E2/E1                                   | 1TUE                    | 1R6N                   |
| COX-1                 | 1P4G   | HRAS/SOS1                                   | 1BKD                    | 2LWI                   |
| COX-2                 | 1CX2   | IL-2/IL-2R                                  | 1Z92                    | 1M48                   |
| EGFr                  | 1M17   | Integrase/LEDGF                             | 2B4J                    | 3LPT                   |
| ERa                   | 1L2I   | MDM4/P53                                    | 3DAB                    | 3LBJ                   |
| FGFr1                 | 1AGW   | TNFa                                        | 1TNF                    | 2AZ5                   |
| FXa                   | 1F0R   | VHL/HIF1A                                   | 4AJY                    | 3ZTD                   |
| GR                    | 1M2Z   | ZIPA/FTSZ                                   | 1F47                    | 1Y2F                   |
| HIVPR                 | 1HPX   | CIAP1-1/CASPASE-9                           | 3D9T                    | 4KMN                   |
| HIVRT                 | 1RT1   | CIAP1-2/SMAC                                | 3D9U                    | 3MUP                   |
| MR                    | 2AA2   | XIAP/CASPASE-9                              | 1NW9                    | 2JK7                   |
| NA                    | 1A4G   | XIAP/SMAC                                   | 1G73                    | 3CM2                   |
| PARP                  | 1EFY   | TNFR1A/TNFB                                 | 1TNR                    | 1FT4                   |
| PPARg                 | 1FM9   | KEAP1/NRF2                                  | 2FLU                    | 4IQK                   |
| PR                    | 1SR7   | KRAS/SOS1                                   | KRAS*                   | 4PZZ                   |
| RXRa                  | 1MVC   | XDM2/P53                                    | 1YCQ                    | 4J3E                   |
| Thrombin              | 1BA8   | CCR5/GP120**                                | 6MET                    | 4MBS                   |
| VEGFr2                | 1VR2   | FKBP1A/CAN-CNB**                            | 6TZ8                    | 1BKF                   |

\*: Modeled structure provided by 2P2I database authors

\*\*: Entries from Table 1
